# Supplementary material for: EBA (Engaged but Amotivated) in AI-enhanced EFL learning: a qualitative study from a Chinese higher vocational context
Source: Front Psychol. 2025 Sep 9;16:1643653. doi: 10.3389/fpsyg.2025.1643653 (PMC12454334; doi:10.3389/fpsyg.2025.1643653)
Supplement: Supplementary file 3 [file Table_2.xlsx]

## Sheet: 问卷
EBA-数媒
课程: 基础英语II			发起教师: 操磊		发起时间: 2025-06-03 09:32:15		积分: 5分
班级: 数媒24321/2			已交/总人数: 39/39人		截止时间:
学生姓名	学号/工号	学校	院系	专业	行政班级	获得积分	提交时间	[简答题]1、Can you tell me a bit about your English learning experience before college?( 在你上大学之前，你是咋学习英语的？可以简单说说你啥时候开始学英语、在哪学的、用过什么方法、有没有参加课外补习班、有没有啥特别的经历或故事、对英语有没有特别喜欢或讨厌的阶段)	[简答题]2、How do you feel about learning English now? Has your attitude changed since entering college? (你目前对学英语的看法和感受是啥？比如觉得英语难不难、有没有兴趣、学起来轻松还是有压力、有没有动力等。和你上大学之前相比，你对英语学习的态度有没有变化？比如以前很喜欢，现在觉得没意思，或者以前觉得英语很难，现在有信心了，等等。)	[简答题]3、What AI tools have you used in your English classes? How do you usually use them? (你在英语课上用过哪些人工智能工具？你通常用这些工具来做什么？比如查单词、翻译句子、写作辅助、语法检查、练口语、批改作文、写作业、回答问题等。)	[简答题]4、Do you use these AI tools outside of class as well? If so, for what tasks?(在课堂之外，你还会不会用这些AI工具？比如在图书馆，宿舍用 AI做作业、复习、准备考试等。如果会，主要用它们来做哪些事情？比如写作文、查资料、翻译、背单词、练口语、做笔记、和AI聊天练习英语口语等。)	[简答题]5、What kind of feedback do you receive from AI tools? How do you respond to that feedback? (AI工具通常会给你什么样的反馈？比如：纠正你的语法错误，帮你润色句子，给你写作建议，给你正确答案，或者只是简单的翻译。你是怎么对待AI给你的这些反馈的？你会认真看、会采纳建议、会对比自己的答案、会产生怀疑、完全依赖，还是有时会忽略？你觉得这些反馈对你有没有帮助？)	[简答题]6、Do you usually complete tasks that involve AI tools? Why or why not? (你平时做的学习任务，比如英语课后作业、英语课堂练习、英语项目等，是不是经常需要用到AI工具？为什么需要或者不需要用AI工具来完成这些任务？)	[简答题]7、How do you behave during AI-assisted English classes? Are you active or passive? (当老师允许或鼓励大家在英语课上用AI工具时，你上课时的表现是很主动积极，还是比较被动？“积极”指的是你会主动举手、积极参与讨论、主动用AI工具帮助学习，经常提问或者探索新的知识学习。被动”指的是你只是完成老师布置的任务，很少主动思考和提问。)	[简答题]8、When you interact with AI tools, do you do it carefully or just try to finish quickly? (你在用AI工具做作业或完成学习任务时，是非常认真仔细地思考、检查、确保质量，还是只是想尽快把任务做完就好？这里“认真”指的是你会花时间理解内容、反复检查、主动学习；尽快做完”指的是你只想完成任务，不太在乎过程和结果，只是一味求快，重在速度。)	[简答题]9、How do you feel emotionally when using AI in your English class? (当你在英语课上使用AI工具：比如 DeepSeek，豆包，腾讯元宝，ChatGPT，等学习的时候，你心里的感受和情绪是什么？是开心、激动、好奇、无聊、焦虑、害怕、失落，还是别的感觉？)	[简答题]10、Do you think deeply about the content when using AI tools, or do you mostly follow instructions? (用AI工具学习时，你是主动在思考和理解AI给你的内容，还是只是跟着AI的步骤做，不太动脑筋？“”主动、认真思考”指的是你会花时间理解学习内容，思考背后的原理，尝试举一反三。“机械、被动按照指令”指的是你只是一步步照做，AI让你填什么你就填什么，完成任务为主，不太去深究内容本身。)	[简答题]11、Can you describe a moment when AI tools helped you understand something better? (你能不能举一个具体的例子，说说有哪一次AI工具真的帮你弄懂了英语学习中的某个知识点？比如AI帮你解释了一个语法点、单词用法、写作结构，或者用AI生成的例句让你突然明白了某个问题。)	[简答题]12、What motivates you to participate in English learning activities involving AI? （是什么原因或者动力让你愿意在英语学习中使用AI工具？换句话说：你为什么会用AI来学习英语？是什么推动、促使你用AI来完成学习任务、练习或活动？）	[简答题]13、Do you learn English because you're interested, or mainly because it's required? （你学习英语的主要原因是什么？是自己对英语有兴趣、觉得学英语有趣、有用、有成就感，所以主动去学？还是主要因为老师或学校要求，比如要完成作业、通过考试、拿学分，不得不学？）	[简答题]14、Has your motivation for learning English changed since using AI tools? How? （在你开始用AI工具以后，你学习英语的动力有没有发生变化？如果有，是变得更有动力，更愿意学了，还是变得更依赖AI、动力减弱了、觉得学习英语没劲了？？请具体说说变化的内容和原因。）	[简答题]15、Do you feel you can make choices about how to use AI tools in your learning? （在你的英语学习过程中，你觉得自己能不能自主决定、自己选择如何使用AI工具？也就是说，你有没有“自主权/选择权”去决定AI工具的使用方式？）	[简答题]16、When AI gives you suggestions or answers, do you always follow them, or do you think for yourself? （当AI工具给你答案或建议时，你是直接按照AI说的去做，还是会结合自己的思考、判断、甚至查资料，然后再决定要不要接受AI的建议？）	[简答题]17、Do you feel more like a learner or a tool user when working with AI? Why? （当你用AI工具学习英语的时候，你觉得自己更像一个“真正的学习者”，主动思考、吸收知识，还是更像一个“工具使用者”，只是把AI当成完成任务的工具，不太投入学习？为什么会有这种感觉？是因为你觉得AI能帮你深入理解内容，还是觉得自己只是机械地利用AI完成任务？）	[简答题]18、Has AI changed how you see yourself as an English learner? In what way? （你可以想想，AI的使用有没有让你变得更自信、更主动、更依赖，还是更被动？是不是觉得英语学习不再那么难了，抑或是觉得学英语变得无聊/没有挑战性了？甚至觉得英语学习失去意义了，因为自己永远没有 AI 优秀？AI 能够更好完成所有英语任务：写作，翻译，阅读，口语等。你是否更重视用AI解决问题，还是觉得自己进步主要靠AI而不是自己？）	[简答题]19、If AI tools were no longer used in your English class, how would you feel? （如果以后英语课不能再用AI工具，你的内心会有什么感受、想法或反应？你会觉得很失落、焦虑、慌乱，不方便，还是觉得没什么影响，甚至觉得反而能促进自己独立思考、独立完成、更好进步？）	[简答题]20、What advice would you give your teacher about using AI in English classes? （你希望老师在英语课堂上怎么用AI工具，或者怎么引导学生更好地使用AI？比如哪些任务适合用AI辅助完成，哪些部分应该要求学生上交手机完后自己完成。你觉得老师在AI教学方面有哪些做得好的地方，或者有哪些可以改进的地方？）
***	***	无锡职业技术学院数字化学习中心	设计艺术学院	数字媒体艺术设计_高中	数媒24321	5	2025-06-03 09:43:56	老师上课内容教学自学听听力看英语电影， 没有参加过课外补习班，考分数很低的时候。	还是有点难的。中等	豆包DeepSeek查单词，翻译句子,翻译课文	翻译查资料	采纳一些	有时候需要,一些不知道的知识通过AI来帮助完整	相对主动	认真思考	好奇	主动思考和理解AI给我的内容，不断进行完善理解	通过帮助理解了句子和句式结构	更加深刻的理解英语的含义，加深理解和记忆	考试	有变化变得更有动力	自主权	结合自己的思考判断	两者都有	借助AI	不方便	随着AI技术不断发展，老师可以持续学习新的AI教学应用和技巧，更好地将AI与英语教学融合，例如学习使用新兴的AI互动教学平台
***	***	无锡职业技术学院数字化学习中心	设计艺术学院	数字媒体艺术设计_高中	数媒24321	5	2025-06-03 09:45:26	通过学校的老师教学，参加过校外补习班。	感觉英语很难，学起来有点压力；	豆包（翻译句子）DeepSeek（查单词、翻译句子、写作辅助）	会，查资料会多一点	帮我润色句子、给我写作建议、翻译，并不会全部采纳，因为AI的答案有些也是错的。	会用ai来翻译	被动	我会比较在乎质量保证	无感	主动，认真思考	AI帮助我翻译课堂上的文章	方便，高效	学校要求、完成作业、通过考试、拿学分	会偏向于依赖AI	有	我会结合自己的思考和判断，包括查询资料，再接受AI的建议	它能教给我一些我平常接触不到的东西，更偏向于真正的学习者	AI可以更好的帮我们规避掉错误答案，能和它学习，我不觉得他会抑制学习。	没什么影响	课文翻译
***	***	无锡职业技术学院数字化学习中心	设计艺术学院	数字媒体艺术设计_高中	数媒24321	5	2025-06-03 09:40:08	学校上课	没兴趣	豆包，翻译	会，生成配图，找资料	润色，翻译，参考ai	经常，方便	被动	比较认真	没什么特别的感觉	先思考ai答案的合理性再照做	用ai帮我翻译和读会了单词	英语能力弱	学校要求	没什么变化	有	结合自己的思考	当成工具使用	没有	没什么影响	无
***	***	无锡职业技术学院数字化学习中心	设计艺术学院	数字媒体艺术设计_高中	数媒24321	5	2025-06-03 09:47:07	在小中高的学习课程中学习，从三年级开始的，在线上购买过网课，没有什么特别的经历。	对于我来说可能学习起来有点困难，我的单词基础很薄弱，这导致我的句子和文章学习起来也很困难。在上大学之前学英语没有什么捷径，不会的只能问同学老师，但是现在很方便，不会的单词可以查询手机，也可以随时随地用手机学习英语，英语对我来说一直挺难的。	deepseek和豆包，通常用来读和翻译。	会，查询资料的时候会	帮我纠正语法错误，和单词意思，我会仔细拼读，以我的能力并不会察觉有什么问题。	是的，因为很多东西不会	主动积极	是的，比如我会反复听ai阅读课文，然后跟读	好奇	我会尽可能的动脑筋	在老师让自己读课文的时候我会用ai学习读英语，这样被老师提问到就不会那么难堪	学习任务	学校要求	变的更有动力了，因为学会了点，就不会那么排斥了	有	会有点思考在里面	真正的学习者	有让我变得更自信	在被提问的时候我会很紧张，而且不太想回答问题，因为没有做好充足的准备，我会没有信心	读英语比较适合用ai来辅助，因为把不会的东西会读了也是一种进步
***	***	无锡职业技术学院数字化学习中心	设计艺术学院	数字媒体艺术设计_高中	数媒24321	5	2025-06-03 09:45:51	大多数是跟随老师学习的，小学正式开始学习，没有参加过补习班，六年级特别喜欢英语，因为老师很好我很喜欢，初中遇到过比较针对的老师，所以就比较摆烂。	没什么看法，还是有压力的。态度没变过	豆包，有道	会，查询各方面的需求问题	比较依赖	是，便捷	被动，	会检查保证质量	平静	我会一题多问，把反馈的回答综合在一起思考，然后根据出现的问题去改进	想不起来了	成绩	目前是学校要求，为了成绩被动比较多	没有	没有吧	会结合，不会给什么就填什么	各一半	没想过	没什么影响，但确实应该会促进一点	无
***	***	无锡职业技术学院数字化学习中心	设计艺术学院	数字媒体艺术设计_高中	数媒24321	5	2025-06-03 09:40:44	学校_x000D_ 没参加补习班_x000D_ 无_x000D_ 讨厌初中默单词	英语很难_x000D_ 高三做卷子还行现在不行了	手机自带翻译_x000D_	不会	有帮助	不想做	被动	尽快完成	没感觉	机械	无	快	不想学	考试会让我紧张然后复习	当然	直接做	2	ai解决问题	一般	老师做很好 非常好
***	***	无锡职业技术学院数字化学习中心	设计艺术学院	数字媒体艺术设计_高中	数媒24321	5	2025-06-03 09:41:43	跟着学校学习	好难，	主要是豆包，基本都做过，口语没有联系过	豆包，DeepSeek，用来做作业，查资料，翻译，	帮我润色句子，给写作建议，会认真看，思考然后看采不采纳	是，经常需要	被动又积极	有时候会只想完成任务，有时候会思考	心情一般吧，可能开心	机械比较多	了解了一些作文的结构	有的太难了不会，或者是想提高自己的正确率	备考，提升自己	变得更依赖AI了	有自主权	填一下固定答案时候，按照AI的来	工具使用者	更依赖	悲伤吧，担心	用AI搞一些有趣的关于学习的游戏
***	***	无锡职业技术学院数字化学习中心	设计艺术学院	数字媒体艺术设计_高中	数媒24321	5	2025-06-03 09:43:03	背单词，小学三年级，在学校学习，学习方法是听课加背单词，没有故事，不是很喜欢英语	语法好难看不懂，态度没变化	不背单词，查单词，背单词	查资料，翻译	简单的翻译，会采纳建议，有帮助	需要，有的题不会	不管怎样我都是被动	都占二分之一	无感	不怎么动脑筋	无，只是用来翻译课文	ai比较方便	转本	没变化	有	结合思考	使用者	没有	不方便，会独立思考	不知道
***	***	无锡职业技术学院数字化学习中心	设计艺术学院	数字媒体艺术设计_高中	数媒24321	5	2025-06-03 09:48:32	小学三年级开始接触，学校，小的时候参加过补习班，对英语并不是喜欢和感兴趣	觉得学英语要记很多单词，不怎么有兴趣，学起来也没有动力	用过豆包查单词	会帮助去解决一些难懂的作业	都有，会看给的反馈符不符合我的要求，有帮助	有时需要，有不懂的单词或对答案不确定	被动	认真思考保证质量	好奇	主动思考	帮我翻译了某些句子让我明白它们的意思	更快的理解	考试	更愿意学了	有	结合自己的思考	真正的学习者，帮我深入理解	更依赖	不方便	让学生用ai翻译不懂的单词
***	***	无锡职业技术学院数字化学习中心	设计艺术学院	数字媒体艺术设计_高中	数媒24321	5	2025-06-03 09:43:12	跟着课本学，在学校，没有参加补习班	英语很难，没有，一值都不喜欢	豆包，查单词	会，用来解题	正确答案，我会认真看然后采取他	是	比较被动	尽快完成	无聊	跟ai做	会读单词	方便	完成作业	没有	不太能自主	直接去做	工具使用者	主要靠ai	有影响	合理适当
***	***	无锡职业技术学院数字化学习中心	设计艺术学院	数字媒体艺术设计_高中	数媒24321	5	2025-06-03 09:41:58	在学校学习，很少参加补习班，没有，在初中和小学的时候很喜欢英语。	没有什么看法，我觉得目前的英语不算很难，学起来也不算有压力，但是没有什么学下去的动力。	用过豆包，基本上都用豆包，也会用网易有道词典，用词典来查单词或查读音，翻译等等。	会用，查单词，查翻译。	我觉得AI工具很不错，很好用，能提高效率。	经常会用到AI工具。	比较被动	尽快把任务做完	豆包，没感觉	偶尔会认真思考	忘记了	使用AI可以提高学习效率，大大节省时间。	因为学校要求和英语考试	没有变化，跟以前差不多	有	结合自己的思考以及AI提供的建议	工具使用者，都有	更被动吧，进步还是要靠自己	有点失落不方便，但是也可以接受	无
***	***	无锡职业技术学院数字化学习中心	设计艺术学院	数字媒体艺术设计_高中	数媒24321	5	2025-06-03 09:44:48	老师上课讲课带着读句子和单词 学习新章节会提前预习 自己查字典 把不认识的单词中文意思写上	对学习英语有兴趣 想学但是没什么动力 态度有变化	网易有道词典 百词斩 豆包	会	可以给我提供整段阅读和翻译	经常需要用到 因为ai方便	被动	都占一半	无聊 害怕 开心	一半一半	让我明白情绪类词语的英文	ai方便快捷	自己对英语感兴趣	动力会减少	有	基本都会看一下 也会在ai答案上进行修改	工具使用者	被动 缺乏独立思考能力	焦虑	ai问答 或者拿ai生成英语小游戏 提高大家积极性参与性和互动
***	***	无锡职业技术学院数字化学习中心	设计艺术学院	数字媒体艺术设计_高中	数媒24321	5	2025-06-03 09:39:23	听老师讲课，参加过补习班，高中初中很不喜欢英语，因为听不懂	还行，还行，没啥变化	豆包，deepseek	会	给答案	是，因为我不会，需要靠AI辅助	积极，主动	做完	开心	跟着豆包大哥走	AI让我知道了一些单词	因为我英语太差了	学业要求	没有	能	直接做，或者跟别人对对看看对不对	使用者，因为有AI我变懒了	主动，因为我心里有底了	焦虑，没动力，不想学	我觉得好，不需要改进
***	***	无锡职业技术学院数字化学习中心	设计艺术学院	数字媒体艺术设计_高中	数媒24321	5	2025-06-03 09:39:58	上课学习听老师读讲和看电视剧	英语是基本沟通能力有信心	豆包	会查资料	ai有点人机有点帮助	偶尔它的语言有时候不是我想要的可以参考	我比较被动	完成任务	好奇	会思考ai给的答案是否合理	有不懂的单词或者语法结构可以参考	方便	沟通能力	更方便	我自己选择去用	思考	思考ai提供的答案	更便利	可能会有其他发生去	引导学生正确运用ai
***	***	无锡职业技术学院数字化学习中心	设计艺术学院	数字媒体艺术设计_高中	数媒24321	5	2025-06-03 09:46:25	小学开始学，后面喜欢听一些英文歌和一些欧美剧会学一点，初中的时候有上英文口语网课	有兴趣但是仅限于看剧的时候和打外服游戏交流的时候。上课感觉比较枯燥	豆包，有道词典	偶尔	提供灵感和方案	不太会ai也不太准确	都有	ai一般是检查自己正确率	没感觉	理解ai，ai有时候也会错	英文小作文有些句子想不起来用ai生成会生成多种表达，可以根据理解和需要选择一种	单词多短语多不一定都记得就需要ai给你提供思路	有点兴趣，但也要完成考试	更依赖了_x000D_	自主决定	思考再用	学习者	没有	可能会学习的困难，很多问题想不到，老师也不可能一一作答。ai可以在老师的讲课中提供之外的拓展。	在拓展的情况下可以用ai提供思路拓展英语学习内容
***	***	无锡职业技术学院数字化学习中心	设计艺术学院	数字媒体艺术设计_高中	数媒24321	5	2025-06-03 09:44:37	很普通的学习方法没有用任何别的巧妙的学习方法。以前遇到过一位很温和的英语老师，很会鼓励人，所以不知不觉爱上了英语。没有参加过课外补习班，一直很喜欢英语。	目前感觉自主学习英语有点难，兴趣减少了很多，压力更大了。	豆包，网易有道词典，用来翻译和写作辅助。	会，主要用来翻译和做作业。	给我正确答案。会采纳。	会需要。很方便。	主动积极，用ai工具。	确保质量做好。	无聊。	思考和理解，然后尝试用自己的方法去做。	目前想不出。	是高效。	英语有趣，实用性很强。	没有，依旧原样。	有自主选择决定权	结合自己的思考判断。	ai是我的学习工具。ai能帮我深入理解内容但我不会依靠它太多。	有了ai英语学习不会很难了，基本还是靠自己。	焦虑，我觉得ai是一个很及时，并且很方便快捷的工具，失去它我会丧失一部分能力。	目前没没有想法。
***	***	无锡职业技术学院数字化学习中心	设计艺术学院	数字媒体艺术设计_高中	数媒24321	5	2025-06-03 09:41:20	背单词背短语	英语难，没有兴趣，有压力，基础不好	豆包，查单词，练口语，写作辅助	做作业	纠正语法错误，有帮助	需要，因为有单词不认识	被动	都有	开心	都有吧	让我知道了单词怎么读	完成作业	考级	愿意学也产生了依赖	能，有	结合	有时候像学习者有时候像使用者	有	失落	不清楚
***	***	无锡职业技术学院数字化学习中心	设计艺术学院	数字媒体艺术设计_高中	数媒24321	5	2025-06-03 09:43:03	上课学英语，高中讨厌	英语难，不想学习，如果天生就中英双修就好了	豆包，都有	会	豆包很好，只有你问的不好	是的，作业难，不想思考	是被动没错了	中肯最后一句	失落，焦虑	嗯	英译中	因为不会，发布的作业	后者	后者，本来也没动力	包有的，一个搜不到用另一个搜	结合思考	利用	靠ai	会	无
***	***	无锡职业技术学院数字化学习中心	设计艺术学院	数字媒体艺术设计_高中	数媒24321	5	2025-06-03 09:39:08	看一些英语资料 比如星火英语	有一点变化 现在没啥意思	豆包	会的背单词练口语	帮我润色句子 简单翻译	是的 需要	积极	尽快完成	无聊	主动思考	帮我长见识	人工智能	有点兴趣吧 想去外国旅游 跟外国友人交流	有点动力吧	。有	大部分是按照ai	工具使用者	变得更主动吧	我很失落	无
***	***	无锡职业技术学院数字化学习中心	设计艺术学院	数字媒体艺术设计_高中	数媒24321	5	2025-06-03 09:45:35	还没开始接触ai，但是会用百度搜索英语意思，有参加过老师的校外补习班，上了初一之后英语就直线下滑，到高中之后就特别差，不喜欢英语了。	我目前对英语的看法就是感觉学英语特别累，努力的想理解意思但是发现英语基础太薄弱，感觉心累。	豆包，词有道APP，deepseek，查翻译，回答问题等。	会用，ai用的挺多的特别是豆包，感觉特别方便，查资料多一点，有时候作业没有头绪也会参考一下豆包的回答。	ai会让我怀疑自己的答案是否正确，它会帮助我很多，但是我觉得弊端就是会让我更加依赖它。	会经常用到，因为对于我这种英语基础非常薄弱，英语非常差的人来说，在完成这些任务的时候，ai会帮助我很多。	我觉得一般，我不是一个特别主动的人，大部分也都是完成任务就好，但个别情况下我也会举手回答问题。	尽快做完	安心	不太动脑筋	ai有一次帮我理解了从句	觉得ai比较正确，一般不出错	学习，考学	一般，感觉没有太大变化	有自主权	二者一半一半吧，都有	工具使用者	更自信，更主动，更依赖	还好，就是希望老师不要喊我回答问题	就正常用就好了
***	***	无锡职业技术学院数字化学习中心	设计艺术学院	数字媒体艺术设计_高中	数媒24321	5	2025-06-03 09:40:08	上课跟着老师学，没有参加过课外补习班	还是觉得挺难的	都有	会查资料，翻译，背单词	ai有很大的帮助	需要，因为有很多不会的单词需要查阅	被动	仔细思考	好奇	不是，会结合AI给的东西深入地去思考	一旦我遇到不会或不会读的单词就会找AI，会给我带来很大的帮助	想要把英语学好	我觉得学习英语对以后的生活和工作有很大的帮助	更愿意去学了	能	结合AI给的建议再进行思考	是，AI可以帮助我更加深入的思考内容	并没有变得自信，只不过是帮助我查阅单词和解决一些问题	会感觉很不方便	如果有些不会的单词和句子我希望可以查阅
***	***	无锡职业技术学院数字化学习中心	设计艺术学院	数字媒体艺术设计_高中	数媒24322	5	2025-06-03 09:45:07	三年级开始学英语，没有上过额外的补习班，小学英语还可以，最认真学英语的时候是高中时期。	以前觉得英语还挺有趣的，但是现在对英语的动力停留在四级，态度上有了懈怠	豆宝	会，比如查单词的读音或者翻译句子	有帮助	先自己做一遍然后用AI再做一遍修改错误的答案	被动	尽快做完	无聊	跟着Ai步骤做	当我遇到不熟悉单词的时候，AI会帮我生成例句，让我更好的掌握单词在不同句子里的意思	AI比较便捷	完成作业	更依赖AI，不擅长思考	可以	有时候会思考一下，因为AI的准确率也不是100%的	工具使用者	进步不止是靠A I我觉得还是要靠自己的自觉，努力和坚定	可能会有些焦虑和慌乱	我觉得目前就可以
***	***	无锡职业技术学院数字化学习中心	设计艺术学院	数字媒体艺术设计_高中	数媒24322	5	2025-06-03 09:59:00	上小学开始学的英语 老师怎么教我的 就怎么学习英语 快中考的时候 参加过补习班 对英语一直以来都是喜欢的 英语是我比较骄傲的一门学科 我也很感兴趣	学英语比较难吧 压力还是有的 要备考四级 有点动力吧 但是和高中比起来 没啥劲了 但是还是很喜欢英语	网易有道词典笔	是的 用ai来做作业 比如ppt的大纲 还有一些项目作业	语法纠错：如Grammarly标出时态混淆（例：将“he go”改为“he goes”）；_x000D_ 写作润色：ChatGPT会优化句式，把“I think it's good”改成“From my perspective, this demonstrates promising potential”；_x000D_ 发音评分：口语100会用波形图对比标准音，提示“单词‘water’的‘r’音未卷舌”。_x000D_ 应对方式：_x000D_ 先核对课本语法规则，再决定是否采纳（如AI建议的虚拟语气用法若和教材冲突，会优先信教材）；_x000D_ 写作润色会保留核心观点，调整AI给的复杂句式以匹配自己的表达习惯；_x000D_ 发音反馈会反复跟读练习，但不会完全依赖系统评分（曾发现系统对方言口音识别有误）。	经常用，尤其在以下场景：课后作业 项目报告_x000D_ _x000D_ • 原因：AI能节省机械性工作时间（如查词、排版	积极吧但是有时候也比较消极	认真检查	开心	主动又有点被动	学虚拟语气时不懂为何用“if I were you”而非“was”。Grammarly标红“If I was a bird”并提示虚拟条件句中be动词用were，还给出三个例句：_x000D_ _x000D_ • If I were rich, I would travel the world.（与现在事实相反）_x000D_ _x000D_ • If she had studied harder, she would have passed the exam.（与过去事实相反）_x000D_ _x000D_ • He talks as if he were the president.（夸张假设）	可以提升效率	兴趣还有适应性	有点依赖ai了	有自主权	一般直接来用 但是也会自己思考	两者都有一点吧	ai更主要的是辅助自己 更好的去完成 它是一个辅助工具	没有啥想法吧 那就自己独立思考	没有啥吧
***	***	无锡职业技术学院数字化学习中心	设计艺术学院	数字媒体艺术设计_高中	数媒24322	5	2025-06-03 09:49:21	三年级，在学校学的，有参加过课外补习班，现在挺喜欢英语的	现在觉得英语还是很有作用的，难，现在比以前喜欢英语	豆包，deepseek查单词，翻译句子	会，在宿舍图书馆都会，查资料，翻译	会认真的看，我会思考稍微修改一下答案	是的	有一点主动	认真	没啥情绪	思考	没有	自己能力不够，还想继续学习	我觉得有用，真的学会了还是会很有成就感的，主动学	多了一点动力	有自主权。不会的，不确定才会去使用	思考，再判断	每个都占一点吧	靠自己，想学才能进步	有点不方便吧	没
***	***	无锡职业技术学院数字化学习中心	设计艺术学院	数字媒体艺术设计_高中	数媒24322	5	2025-06-03 09:43:52	上大学之前使用英语资料学习小学三年级开始学习英语，在学校里面没有参加过课外补习班，初二时对英语非常喜欢。	我觉得英语挺难的，但是下功夫肯定能学会	我用过deepthick，豆包，快对AI，一般用来翻译句子，写作辅助	会，查资料	写作建议，正确答案，会认真看采纳建议	80%使用，需要AI的辅助来纠正语法	很积极	半对半，既思考也想尽快把任务做完	激动	对AI给出的内容进行思考，觉得是否合适	有一个英语作业是需要介绍家乡，我就是使用AI帮我生成语句，我进行朗读。	因为AI工具的功能强大，能够帮助我们更好的学习英语	几位老师和学校要求，次要是有趣有用	我感觉越来越依赖，因为AI的功能太过于强大，限制学生的思考	有自主权	结合自己的思考判断	觉得更像一个工具使用者	使用AI我觉得学英语变得没有挑战性了	感觉还是比较慌乱的，但是也能促进自己独立思考，独立完成	在一些语句翻译上可以使用AI
***	***	无锡职业技术学院数字化学习中心	设计艺术学院	数字媒体艺术设计_高中	数媒24322	5	2025-06-03 09:54:30	在学校学习英语 通过百词斩 多邻国等软件来巩固英语学习 可以用来记单词 强化口语	学习英语是有益的。但是有些英语单词、句子有些复杂难懂 学起来又有些压力。和上大学之前相比 对英语的学习态度没有变化	例如豆包、deepseek、网易有道词典等	会使用。比如在遇到一些难懂的东西或者一些作业上的指定会使用AI工具	AI可以给我一些建议或者直接给我正确答案。对于AI给我的反馈我会认真看完之后选择部分采纳 持有怀疑态度 没有照搬。这些反馈对我来说是有帮助的	经常会用到AI。因为不知道有些字词句子的意思 以及语法上的问题 需要借助AI来完成作业	积极	认真思考、检查、确保质量	好奇	会去主动思考和理解AI给的内容	做英语练习时帮我搞懂了英语的一个语法、时态	AI可以更好的帮助我完成作业。或者在比较紧急的情况下会使用ai	感兴趣 以及要通过英语四级考试	没有变化	能够自主决定 自己选择	结合自己的思考、理解去决定是否使用ai的建议	感觉更像是工具使用者	AI的使用让我更主动 不会觉得英语那么难	会促进自己的独立思考能够更好进步	无
***	***	无锡职业技术学院数字化学习中心	设计艺术学院	数字媒体艺术设计_高中	数媒24322	5	2025-06-03 09:48:57	练习题，英语词典	没有什么兴趣，学起来有点压力	豆包 查单词，翻译句子，写作辅助，练口语，写作业，回答问题	会	会给我写作建议以及正确的答案，会纠正我的口语问题 我会认真看，采纳一些聊但不完全采纳，会对比自己的答案，会产生怀疑，不会完全依赖 有帮助	需要 自己没有什么想法 对自己的答案不自信	被动	会稍微认真思考检查，也有部分是一心只想完成任务	有一种问题被解决了的满足感	都有 根据情况而定	做练习题时自己做了一遍 发现和Al的不一样，就去看Al的解析，才明白这道题的语法点和单词用法是我没弄清楚	时间 作业 任务	大部分原因是学校要求 为了完成作业 考试拿学分	有，觉得学英语没有那么困难了	可以自主决定，但我不一定能控制住自己不去使用它	看情况	都有一点点	是	焦虑 失落	无
***	***	无锡职业技术学院数字化学习中心	设计艺术学院	数字媒体艺术设计_高中	数媒24322	5	2025-06-03 09:45:03	学校教学_x000D_ 三年级开始学习，在学校_x000D_ 小学参加过补课班_x000D_	没有特别大的兴趣，有点难_x000D_ 上大学后开始不上心了_x000D_ _x000D_	用豆包翻译句子	会，AI写作业	给我正确答案，给我一些建议	是_x000D_ 因为自己完成很吃力	被动	两种来回切换。看作业要求	没有过多的感觉	不太动脑筋	帮我翻译英语课文	为了搞懂老师的问题	学业要求	动力减弱	有	会自己判断	不太投入_x000D_ 觉得自己只是机械地利用AI完成任务	更加依赖AI_x000D_ 更加重视用AI解决问题	不方便	可以让同学们使用AI翻译句子，纠正读音
***	***	无锡职业技术学院数字化学习中心	设计艺术学院	数字媒体艺术设计_高中	数媒24322	5	2025-06-03 09:52:30	高中时候特别想学好英语 但是底子和自律性太差 无法提动成绩	现在是喜欢英语的，依旧想把英语学好，目前四级对我来说有点困难	豆包 翻译 回答问题	会_x000D_ 宿舍 作业 _x000D_ 用于查资料 翻译 背单词 翻译	给我大多数正确答案，会对比自己的答案,同时也会产生一点依赖性 ，有	是_x000D_ 确保答案的准确性	主动积极_x000D_ 主动举手 参与讨论 用ai帮助学习/主动花时间理解内容。	主动花时间去理解学习内容同时也是尽量快点完成作业。	开心又麻木	会被动的按照指令完成任务。_x000D_ 但也会看ai给出的解析。	每次文章翻译卡壳的时候，AA都能够顺畅的让语句通顺	AA更能想出想不到的东西 速度 包括理解题目的意思。	自己对英语感兴趣	是愿意学习英语的，但同时也更依赖ai了。	由自主主动去去学习。	结合一点自己的思考。	更像的工具使用者。	你让我变得更自信更主动，也更依赖。	会有一点焦虑的感觉。	交代一些可以用ai的作业。
***	***	无锡职业技术学院数字化学习中心	设计艺术学院	数字媒体艺术设计_高中	数媒24322	5	2025-06-03 09:49:28	跟随老师的上课进度学习，在学校里学习英文，初中阶段有参加过课外补习班，没有对英语特别讨厌和喜欢的阶段。	学英语对我们来说很有帮助，个人感觉难，英文词汇量，语法要吃透，与上大学相比，之前对待英语的态度显得更认真些。	用过豆包，百度等工具_x000D_ 用来查生词，翻译长难句分析等。	会的，因为自身学习程度不深，会用来辅助完成作业。	AI对我的帮助很多，感谢AI的存在能够解决我现阶段的问题和任务，但也会自主学习思考一下，对于AI工具的帮助，会产生很大的依赖性，但也会对比自己的答案进行取舍。	是的，需要，因为我不太懂。	主动积极的，会参与讨论。	会思考	激动吧，因为知道有AI的帮助可以让我了解自己不知道的东西	会思考。	补考时，向AI工具询问英语语法知识点，并且做笔记，搞懂了一点儿。	AI知识面覆盖广，我自己不会。	完成学业任务，了解外国文化。	更依赖了	可以的	会思考	学习者	让我更被动，但也了解到了一些东西，在AI的帮助下，英语学习可能会变得更简单？用AI解决问题不代表自己退步，工具可以帮助我们很多，学会思考就是自己在进步。	会觉得焦虑，不方便_x000D_ 不过应该会让我多动动脑子	在自己不懂的时候可以适量使用AI工具，查询生词，不懂得语法_x000D_
***	***	无锡职业技术学院数字化学习中心	设计艺术学院	数字媒体艺术设计_高中	数媒24322	5	2025-06-03 09:44:39	网课、补习班	英语感觉变难了兴趣就没有之前多了	豆包 查单词和翻译句子	查资料	简单的翻译	网上一点点找太麻烦	被动	认真	好奇	主动	英语课上的语法知识点	想完成的更好	觉得学英语有用	更依赖AI	能自主决定	结合自己的思考	真正的学习者	更主动也更依赖	不方便	写作方面
***	***	无锡职业技术学院数字化学习中心	设计艺术学院	数字媒体艺术设计_高中	数媒24322	5	2025-06-03 10:09:42	通过请教老师，查看书籍，同学讨论，网上查询等方式学习英语。_x000D_ 从小学三年级开始学习英语，在学校接触英语，没有参加过课外补习班，不论学习还是生活方面，感觉英语是非常重要的学科。	英语不是非常困难的学科，对英语还有有兴趣的，每次完成任务时，或独自解决问题时，有种豁然开朗的感觉。只要用心学，就不算是困难。偶尔会有压力，也会焦虑，但还是会有信心和动力。_x000D_ 上大学以来手机接触更频繁，获取信息的方式更简单，偶尔在自主学习上会松懈。并未有多大改变，还是对英语有信心。	豆包，深度求索等。_x000D_ 查单词，翻译写作辅助，回答问题等。_x000D_	图书馆，宿舍用ai写作业，准备考试。_x000D_ 写作文，查资料，翻译，查单词。_x000D_	帮我润色修改句子，给我正确答案，翻译。_x000D_ 认真看，并会采纳意见，但偶尔会有质疑。_x000D_ 有帮助。	会。_x000D_ 自己能力有限，会对自己的答案不太满意。	主动积极。_x000D_ 在自己能力范围内都主动。_x000D_	都考虑。_x000D_ 理解内容，主动学习。_x000D_ 都在乎。	开心，激动，好奇，有点点失落。	跟着步骤做但还会主动思考，理解。	翻译句子，其中有自己不会的单词。	方便，更快。	觉得英语有趣，更有用。_x000D_ 完成作业和考试占一小部分	没有。	有。	结合实际和自己想要的材料。	一半一半。_x000D_ 缺乏了自己的深度思考。	偶尔主动，偶尔被动。多是靠ai。	失落，焦虑，感觉自己完成的不够完美，不够完善	有难度的课利用ai辅助，能力范围内，或较简单的自己独立完成。无
***	***	无锡职业技术学院数字化学习中心	设计艺术学院	数字媒体艺术设计_高中	数媒24322	5	2025-06-03 20:25:21	小学三年级开始学英语，学校统一上课，初一的时候参加过课外补习班	正常感受，有压力也有动力。	DeepSeek，网易有道词典。查单词、翻译句子。	会。查资料、翻译。	给我写作建议或者正确答案。我会认真看并采纳意见。	不需要。不值当。	被动。	会认真思考检查。	没有什么特别的感觉。	会主动思考。	没有。	可以更好的回答问题。	学校要求。	没有发生什么变化。	有。	多种方式结合确保正确。	看情况。两种都有可能。	更重视用AI解决问题。	没什么影响。	没有。
***	***	无锡职业技术学院数字化学习中心	设计艺术学院	数字媒体艺术设计_高中	数媒24322	5	2025-06-03 09:41:13	一直没认真学过英语	难	豆包	会	查答案	是	主动	认真	没感觉	举一反三	没有	因为我不会	完成作业	没有	能	结合自己思考	工具使用者	无聊，学英语没用	无所谓	让学生自己自行使用
***	***	无锡职业技术学院数字化学习中心	设计艺术学院	数字媒体艺术设计_高中	数媒24322	5	2025-06-03 19:52:47	上学校学	还可以吧	没用过	不会	不用ai	不是	被动	_x000D_ 做完就好	没什么感觉	普通思考	不能	没什么原因	大学要学	没有	能	照做	工具使用者	没有	没什么感受	都可以
***	***	无锡职业技术学院数字化学习中心	设计艺术学院	数字媒体艺术设计_高中	数媒24322	5	2025-06-03 09:47:30	在学校学习英语，三年级开始学习，没有参加过课外补习班，和外国人通过电话用英语交流。	我觉得英语好难，单词记不住，也没有兴趣但是要考四级就要坚持学，曾经上高中之前对英语也是蛮喜欢的，但是在高中日复一日的做卷子磨灭掉了所有热情	查单词，翻译	我会用AI学习单词，准备考试	AI会帮我给出写作建议和单词，我会采纳建议	课后作业我不会的句子会用AI来进行翻译	我会很积极	我会认真学习	我会很安心	我会跟着AI的步骤	AI会给出我想要表达却表达不出来的句子	对英语的不熟练	要考过四级	会依赖AI，因为对英语不熟练，但也会激发我的热情	可以自主决定	我会看AI给出的解题步骤	工具使用者	会主动	失落	做题时自主做，做完用AI看AI的解题思路
***	***	无锡职业技术学院数字化学习中心	设计艺术学院	数字媒体艺术设计_高中	数媒24322	5	2025-06-03 09:46:22	高中时老师让背就背，在学校学。对英语谈不上喜欢。	我个人没有兴趣，高中喜欢过一段时间，积累不够，现在听不懂也没有兴趣学。	用kimi来查英语翻译	查资料用，方便。	给我正确答案和其他延伸意思	是，因为看不懂题。	并不被动也不积极，自己默默的用。	尽快做完，因为英语对我来说是天文，我看不懂，也没多少兴趣学。	开心，因为感觉到自己不会的东西得到解答，对其有了认知	一半一半，因为ai也不准，不是全对所以自己会写一部分	之前写英语作文查资料看不懂，用ai翻译辅助完了了作文。	因为我英语太差了以至于我看不懂听不懂。所以需要ai辅助理解。	学校要求，拿及格分	至少英语课我愿意上，如果没有ai我是一节课都听不懂。	能	有思考的，ai不是全能，它不会就瞎编乱造。至少得自己判断	工具使用者，我个人只是因为学校有这门课，需要学。英语并非我的兴趣课。	变得更自信了。感觉英语没怎么难了。	我会焦虑，因为不用ai我就真的一点点都听不懂了。并不能促进独立思考，因为本身就没有知识储备且不具有兴趣。	一般用在翻译课文上。
***	***	无锡职业技术学院数字化学习中心	设计艺术学院	数字媒体艺术设计_高中	数媒24322	5	2025-06-03 20:22:49	美剧和课程	一般	用来翻译查词汇 速记 练听力	偶尔	润色句子 反馈有帮助 来看	是 有自己不知道的 不理解的内容和词汇	被动主动结合	一般	好奇 激动	主动	翻译一个复杂的句子	学习的需要	感兴趣和学业	资源更多 学习更便捷	有_x000D_	结合思考	真正的学习者	更主动	没什么影响	用不同的ai生成答案 进行ai之间的对抗 来学习 不同的方法
***	***	无锡职业技术学院数字化学习中心	设计艺术学院	数字媒体艺术设计_高中	数媒24321	5	2025-06-03 09:51:20	就是先背单词，有一定量的积累，然后再开始学习语法。	感觉没有在高中的时候爱学英语了，但是学起来还行，难度不是很大，慢慢调整心态后会好很多	豆包，英汉互译，通常用来搜题目，搜单词翻译发音。	我还是会用的。期末复习，平常的英语练习	我会参考他的答案，但也会结合自己的看法，并不会完全依赖，但对我来说也是很有帮助的	是的。我觉得自己能力不够强，需要借助AI	比较被动	认真仔细思考	比较开心，好奇	一般主动理解但不会举一反三	AI帮我解释了一个语法，在考试之前，然后第二天的考试刚好有，就会做了	AI回答的比较快，精准	学校要求	更多时候很依赖了	有自主权	一般会直接照做	是的，因为我感觉对的	很被动	很难过	帮我们翻译
